# Supplementary material for: Double/debiased machine learning for difference-in-differences models
Source: Oxford University Press journal article supplement (doi:10.1093/ectj/utaa001), 2020-02-04
Supplement: utaa001_online_appendix.pdf [file utaa001_online_appendix.pdf]

## ONLINE APPENDIX

NENG-CHIEH CHANG

## S1. MONTE CARLO

**ML estimation (repeated cross sections):** Let  $N$  be the sample size and  $p$  the dimension of control variables,  $X_i \sim N(0, I_{p \times p})$ . Also, let  $\gamma_0 = (1, 1/2, 1/3, 1/4, 1/5, 0, \dots, 0) \in \mathbb{R}^p$ .  $D$  is generated by the propensity score

$$P(D = 1 | X) = \frac{1}{1 + \exp(-X'\gamma_0)} \text{(Logistic)}.$$

The potential outcomes are generated by  $Y_i^0(0) = 1 + \varepsilon_1, Y_i^0(1) = Y_i^0(0) + 1 + \varepsilon_2, Y_i^1(1) = \theta_0 + Y_i^0(1) + \varepsilon_3$ , where  $\beta_0 = \gamma_0 + 0.5$  and  $\theta_0 = 3$ , and all error terms follow  $N(0, 0.1)$ . Define  $Y_i(0) = Y_i^0(0)$  and  $Y_i(1) = Y_i^0(1)(1 - D_i) + Y_i^1(1)D_i$ . Let  $T_i$  follow a Bernoulli distribution with parameter 0.5. Researchers observe  $\{Y_i, T_i, D_i, X_i\}$  for  $i = 1, \dots, N$ , where  $Y_i = Y_i(0) + T_i(Y_i(1) - Y_i(0))$ .

**ML estimation (multilevel treatments):** Suppose there are two levels of treatment so that  $W \in \{0, 1, 2\}$ . Let  $N$  be the sample size and  $p$  the dimension of control variables,  $X_i \sim N(0, I_{p \times p})$ . Also, let  $\gamma_0 \in \mathbb{R}^p$ , such that  $\gamma_0 = (1, 1/2, 1/3, 1/4, 1/5, 0, \dots, 0)$  and

$$(P(W = 0), P(W = 1), P(W = 2)) = (0.3, 0.3, 0.4)$$

The potential outcomes are generated by  $Y_i^0(0) = X'\beta_0 + \varepsilon_1, Y_i^0(1) = Y_i^0(0) + 1 + \varepsilon_2, Y_i^1(1) = \theta_{10} + Y_i^0(1) + \varepsilon_3, Y_i^2(1) = \theta_{20} + Y_i^0(1) + \varepsilon_4$ , where  $\beta_0 = \gamma_0 + 0.5$  and  $\theta_{10} = 3$  and  $\theta_{20} = 6$ , and all error terms follow  $N(0, 0.1)$ . Researchers observe  $\{Y_i(0), Y_i(1), W_i, X_i\}$  for  $i = 1, \dots, N$ , where  $Y_i(0) = Y_i^0(0)$  and  $Y_i(1) = Y_i^0(1)I(W_i = 0) + Y_i^1(1)I(W_i = 1) + Y_i^2(1)I(W_i = 2)$ . I focus on the estimation of the second-level ATT  $\theta_{20}$ .

## S2. PROOFS OF THE NEYMAN-ORTHOGONAL SCORES

**Proof of Lemma 3.1. Repeated outcomes:**

The Gateaux derivative of (3.1) in the direction  $\eta_1 - \eta_{10} = (g - g_0, \ell_1 - \ell_{10})$  is

$$\begin{aligned} \partial_{\eta_1} E_P[\psi_1(W, \theta_0, p_0, \eta_{10})] &= E_P \left[ \frac{(D-1)(Y(1) - Y(0) - \ell_{10}(X))}{p_0(1 - g_0(X))^2} (g(X) - g_0(X)) \right] \\ &\quad - E_P \left[ \frac{D - g_0(X)}{p_0(1 - g_0(X))} (\ell_1(X) - \ell_{10}(X)) \right] \\ &= - E_P \left[ \frac{g(X) - g_0(X)}{p_0(1 - g_0(X))} E[Y(1) - Y(0) - \ell_{10}(X) | X, D = 0] \right] \\ &\quad - E_P \left[ \frac{(\ell_1(X) - \ell_{10}(X))}{p_0(1 - g_0(X))} E_P[D - g_0(X) | X] \right] \\ &= - E_P \left[ \frac{g(X) - g_0(X)}{p_0(1 - g_0(X))} (\ell_{10}(X) - \ell_{10}(X)) \right] - 0 \\ &= 0, \end{aligned}$$

where the second inequality follows from the law of iterated expectations and the third from the definition of  $\ell_{10}(X)$  and  $E_P[D - g_0(X)|X] = 0$ .

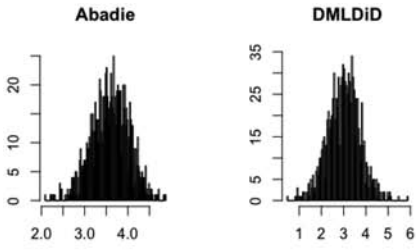

(a) Logit Lasso

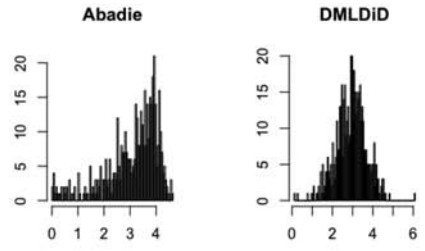

(b) SVM

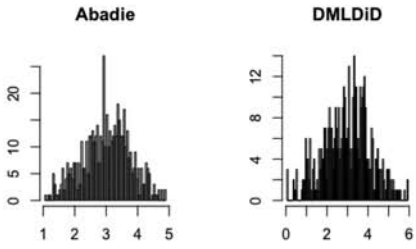

(c) Regression Trees

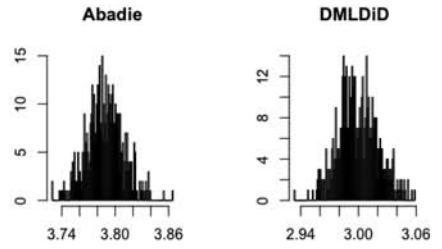

(d) Random Forests

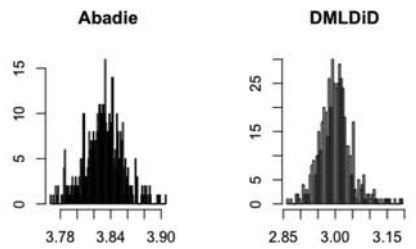

(e) Boosting

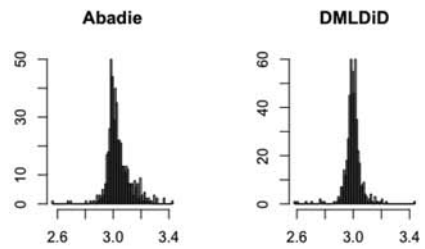

(f) Neural Nets

Figure S1. Repeated cross sections.

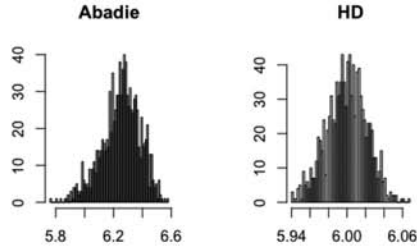

(a) Logit Lasso

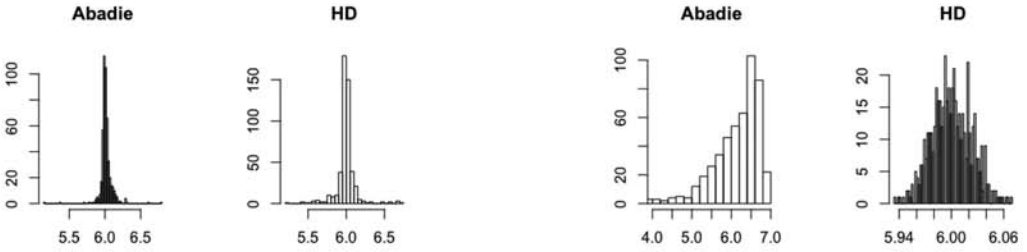

(b) Neural Nets

(c) SVM

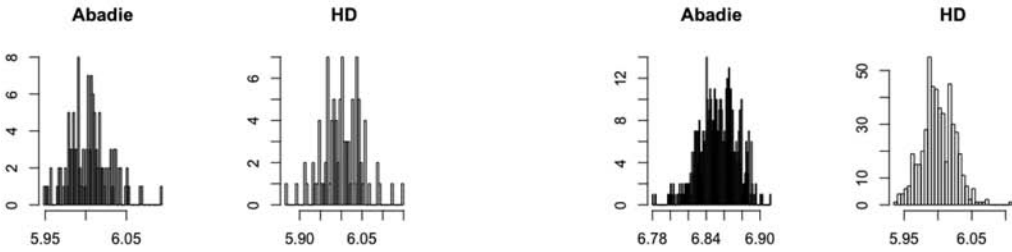

(d) Regression Trees

(e) Random Forests

Figure S2. Multilevel treatment.

**Repeated cross sections:**

Similar to the proof of repeated outcomes, the Gateaux derivative of (3.2) in the direction  $\eta_2 - \eta_{20} = (g - g_0, \ell_2 - \ell_{20})$  is

$$\begin{aligned} \partial_{\eta_2} E_P [\psi_2(W, \theta_0, p_0, \lambda_0, \eta_{20})] &= E_P \left[ \frac{(D-1)((T-\lambda_0)Y - \ell_{20}(X))}{p'_0(1-g_0(X))^2} (g(X) - g_0(X)) \right] \\ &\quad - E_P \left[ \frac{D-g_0(X)}{p'_0(1-g_0(X))} (\ell_2(X) - \ell_{20}(X)) \right] \\ &= -E_P \left[ \frac{g(X) - g_0(X)}{p'_0(1-g_0(X))} (\ell_{20}(X) - \ell_{20}(X)) \right] \\ &\quad - E_P \left[ \frac{\ell_2(X) - \ell_{20}(X)}{p\lambda(1-\lambda)(1-g(X))} E_P [D - g_0(X) | X] \right] \\ &= 0, \end{aligned}$$

where  $p'_0 \equiv p_0\lambda_0(1-\lambda_0)$ .

**Multilevel treatment:**

Let  $\Delta_w = g_w - g_{w0}$ ,  $\Delta_z = g_z - g_{z0}$ , and  $\Delta_{\ell_3} = \ell_3 - \ell_{30}$ . The Gateaux derivative of (3.3) in the direction  $\eta_w - \eta_{w0} = (g_w - g_{w0}, g_z - g_{z0}, \ell_3 - \ell_{30})$  is

$$\begin{aligned} \partial_{\eta_w} E_P [\psi_w(W, \theta_0, p_{w0}, \eta_{w0})] &= E_P \left[ \frac{I(W=0)g_{w0}(X)}{p_{w0}g_{z0}(X)^2} (Y(1) - Y(0) - \ell_{30}) \Delta_w \right] \\ &\quad - E_P \left[ \frac{I(W=0)}{p_{w0}g_{z0}(X)} (Y(1) - Y(0) - \ell_{30}) \Delta_z \right] \\ &\quad + E_P \left[ \frac{I(W=0)g_{w0}(X) - I(W=w)g_{z0}(X)}{p_{w0}g_{z0}(X)} \Delta_{\ell_3} \right] \\ &= 0 \end{aligned}$$

by the law of iterated expectation on each term. □

**S3. ADDITIONAL PROOFS**

**Proof of Theorem 3.1.** The proof proceeds in five steps. In Step 1, I show the main result using the auxiliary results (A.1) through (A.4). In Steps 2 through 5, I prove the auxiliary results.

$$\sup_{\eta_1 \in \mathcal{T}_N} (E [\| \psi_1(W, \theta_0, p_0, \eta_1) - \psi_1(W, \theta_0, p_0, \eta_{10}) \|^2])^{1/2} \leq \varepsilon_N, \quad (\text{A.1})$$

$$\sup_{r \in (0,1), \eta_1 \in \mathcal{T}_N} \| \partial_r^2 E [\psi_1(W, \theta_0, p_0, \eta_{10} + r(\eta_1 - \eta_{10}))] \| \leq (\varepsilon_N)^2, \quad (\text{A.2})$$

$$\sup_{\eta_1 \in \mathcal{T}_N} (E_P [\| \partial_p \psi_1(W, \theta_0, p_0, \eta_1) - \partial_p \psi_1(W, \theta_0, p_0, \eta_{10}) \|^2])^{1/2} \leq \varepsilon_N, \quad (\text{A.3})$$

$$\sup_{p \in \mathcal{P}_N, \eta_1 \in \mathcal{T}_N} (E_P [\| \partial_p^2 \psi_1(W, \theta_0, p, \eta_1) - \partial_p^2 \psi_1(W, \theta_0, p_0, \eta_{10}) \|^2])^{1/2} \leq \varepsilon_N, \quad (\text{A.4})$$

where  $\mathcal{T}_N$  is the set of all  $\eta_1 = (g, \ell_1)$  consisting of  $P$ -square-integrable functions  $g$  and  $\ell_1$ , such that

$$\| \eta_1 - \eta_{10} \|_{P,2} \leq \varepsilon_N,$$

$$\|g - 1/2\|_{P, \infty} \leq 1/2 - \kappa,$$

$$\|g - g_0\|_{P, 2}^2 + \|g - g_0\|_{P, 2} \times \|\ell_1 - \ell_{10}\|_{P, 2} \leq (\varepsilon_N)^2,$$

and  $\mathcal{P}_N$  is the set of all  $p > 0$ , such that  $|p - p_0| \leq N^{-1/2}$ . Then, by Assumption (3.1) and  $|\hat{p}_k - p_0| = O_P(N^{-1/2})$ , we have  $\hat{\eta}_{1k} \in \mathcal{T}_N$  and  $\hat{p}_k \in \mathcal{P}_N$  with probability  $1 - o(1)$ .

*Step 1.* Observe that we have the decomposition

$$\begin{aligned} \sqrt{N}(\tilde{\theta} - \theta_0) &= \sqrt{N} \left( \frac{1}{K} \sum_{k=1}^K \tilde{\theta}_k - \theta_0 \right) \\ &= \sqrt{N} \frac{1}{K} \sum_{k=1}^K \mathbb{E}_{n,k} [\psi_1(W, \theta_0, \hat{p}_k, \hat{\eta}_{1k})] \\ &= \sqrt{N} \frac{1}{K} \sum_{k=1}^K \mathbb{E}_{n,k} [\psi_1(W, \theta_0, p_0, \hat{\eta}_{1k})] \\ &\quad + \underbrace{\sqrt{N} \frac{1}{K} \sum_{k=1}^K \mathbb{E}_{n,k} [\partial_p \psi_1(W, \theta_0, p_0, \hat{\eta}_{1k})] (\hat{p}_k - p_0)}_a \\ &\quad + \underbrace{\sqrt{N} \frac{1}{K} \sum_{k=1}^K \mathbb{E}_{n,k} [\partial_p^2 \psi_1(W, \theta_0, \bar{p}_k, \hat{\eta}_{1k})] (\hat{p}_k - p_0)^2}_b, \end{aligned}$$

where  $\bar{p}_k \in (\hat{p}_k, p_0)$ . By the triangle inequality, the expectation in term (a) satisfies

$$|\mathbb{E}_{n,k} [\partial_p \psi_1(W, \theta_0, p_0, \hat{\eta}_{1k})] - E_P [\partial_p \psi_1(W, \theta_0, p_0, \eta_{10})]| \leq J_{1,k} + J_{2,k},$$

where

$$J_{1,k} = |\mathbb{E}_{n,k} [\partial_p \psi_1(W, \theta_0, p_0, \hat{\eta}_{1k})] - \mathbb{E}_{n,k} [\partial_p \psi_1(W, \theta_0, p_0, \eta_{10})]|,$$

$$J_{2,k} = |\mathbb{E}_{n,k} [\partial_p \psi_1(W, \theta_0, p_0, \eta_{10})] - E_P [\partial_p \psi_1(W, \theta_0, p_0, \eta_{10})]|.$$

The goal is to show that  $J_{1,k} = o_p(1)$  and  $J_{2,k} = o_p(1)$ . To bound  $J_{2,k}$ , we have  $E_P[J_{2,k}] = 0$  and

$$\begin{aligned} E_P [J_{2,k}^2] &\leq n^{-1} E_P [(\partial_p \psi_1(W, \theta_0, p_0, \eta_{10}))^2] \\ &= n^{-1} E_P \left[ \frac{1}{p_0^4 (1 - g_0)^2} U^2 V_1^2 \right] \\ &\leq n^{-1} \left( \frac{C^2}{p_0^4 \kappa^2} \right), \end{aligned}$$

where the last inequality follows from Assumption (3.1). By Chebyshev's inequality,  $J_{2,k} = O_P(n^{-1/2}) = o_p(1)$ . Next, we bound  $J_{1,k}$ . Conditional on the auxiliary sample  $I_k^c$ ,  $\hat{\eta}_{1k}$  can be treated as fixed. Under the

event that  $\hat{\eta}_{1k} \in \mathcal{T}_N$ , we have

$$\begin{aligned} E_P \left[ J_{1,k}^2 \mid (W_i)_{i \in I_k^c} \right] &= E_P \left[ \left\| \partial_p \psi_1(W, \theta_0, p_0, \hat{\eta}_{1k}) - \partial_p \psi_1(W, \theta_0, p_0, \eta_{10}) \right\|^2 \mid (W_i)_{i \in I_k^c} \right] \\ &\leq \sup_{\eta_1 \in \mathcal{T}_N} E_P \left[ \left\| \partial_p \psi_1(W, \theta_0, p_0, \eta_1) - \partial_p \psi_1(W, \theta_0, p_0, \eta_{10}) \right\|^2 \right] \\ &= \varepsilon_N^2 \end{aligned}$$

by (A.3). Because conditional convergence implies unconditional convergence (Lemma A.1),  $J_{1,k} = O_P(\varepsilon_N) = o_P(1)$ . Together, we have

$$\mathbb{E}_{n,k} \left[ \partial_p \psi_1(W, \theta_0, p_0, \hat{\eta}_{1k}) \right] \xrightarrow{P} E_P \left[ \partial_p \psi_1(W, \theta_0, p_0, \eta_{10}) \right] = G_{1p_0}.$$

By the triangle inequality again, the expectation in term (b) satisfies

$$\left| \mathbb{E}_{n,k} \left[ \partial_p^2 \psi_1(W, \theta_0, \bar{p}_k, \hat{\eta}_{1k}) \right] - E_P \left[ \partial_p^2 \psi_1(W, \theta_0, p_0, \eta_{10}) \right] \right| \leq J_{3,k} + J_{4,k},$$

where

$$\begin{aligned} J_{3,k} &= \left| \mathbb{E}_{n,k} \left[ \partial_p^2 \psi_1(W, \theta_0, \bar{p}_k, \hat{\eta}_{1k}) \right] - \mathbb{E}_{n,k} \left[ \partial_p^2 \psi_1(W, \theta_0, p_0, \eta_{10}) \right] \right|, \\ J_{4,k} &= \left| \mathbb{E}_{n,k} \left[ \partial_p^2 \psi_1(W, \theta_0, p_0, \eta_{10}) \right] - E_P \left[ \partial_p^2 \psi_1(W, \theta_0, p_0, \eta_{10}) \right] \right|. \end{aligned}$$

To bound  $J_{4,k}$ , we have

$$\begin{aligned} E_P \left[ J_{4,k}^2 \right] &\leq n^{-1} E_P \left[ \left( \partial_p^2 \psi_1(W, \theta_0, p_0, \eta_{10}) \right)^2 \right] \\ &= n^{-1} E_P \left[ \frac{4}{p_0^6} \frac{U^2 V_1^2}{(1-g_0)^2} \right] \\ &\leq n^{-1} \left( \frac{4C^2}{p_0^6 \kappa^2} \right), \end{aligned}$$

where the last inequality follows from the regularity conditions. By Chebyshev's inequality,  $J_{4,k} = O_P(n^{-1/2}) = o_P(1)$ . Conditional on  $I_k^c$ , both  $\bar{p}_k$  and  $\hat{\eta}_{1k}$  can be treated as fixed. Under the event that  $\hat{p}_k \in \mathcal{P}_N$  (thus  $\bar{p}_k \in \mathcal{P}_N$ ) and  $\hat{\eta}_{1k} \in \mathcal{T}_N$ , we have

$$\begin{aligned} E_P \left[ J_{3,k}^2 \mid (W_i)_{i \in I_k^c} \right] &= E_P \left[ \left\| \partial_p^2 \psi_1(W, \theta_0, \bar{p}_k, \hat{\eta}_{1k}) - \partial_p^2 \psi_1(W, \theta_0, p_0, \eta_{10}) \right\|^2 \mid (W_i)_{i \in I_k^c} \right] \\ &\leq \sup_{p \in \mathcal{P}_N, \eta_1 \in \mathcal{T}_N} E_P \left[ \left\| \partial_p \psi_1(W, \theta_0, p, \eta_1) - \partial_p \psi_1(W, \theta_0, p_0, \eta_{10}) \right\|^2 \right] \\ &\leq \varepsilon_N^2 \end{aligned}$$

by (A.4). By Lemma A.1 again,  $J_{3,k} = O_P(\varepsilon_N) = o_P(1)$ . Hence,

$$\mathbb{E}_{n,k} \left[ \partial_p^2 \psi_1(W, \theta_0, \bar{p}_k, \hat{\eta}_{1k}) \right] \xrightarrow{P} E_P \left[ \partial_p^2 \psi_1(W, \theta_0, \bar{p}_k, \hat{\eta}_{1k}) \right].$$

Combine the above results with  $\hat{p}_k - p_0 = \mathbb{E}_{n,k}[D - p_0]$  and  $(\hat{p}_k - p_0)^2 = O_P(N^{-1})$ , and the decomposition of  $\tilde{\theta}$  becomes

$$\begin{aligned} \sqrt{N}(\tilde{\theta} - \theta_0) &= \sqrt{N} \frac{1}{K} \sum_{k=1}^K \mathbb{E}_{n,k} [\psi_1(W, \theta_0, p_0, \hat{\eta}_{1k})] \\ &\quad + \left[ \sqrt{N} \frac{1}{K} \sum_{k=1}^K G_{1p_0} \mathbb{E}_{n,k} [(D - p_0)] + o_P(1) \right] + O_P(N^{-1/2}) \\ &= \sqrt{N} \frac{1}{K} \sum_{k=1}^K \mathbb{E}_{n,k} [\psi_1(W, \theta_0, p_0, \hat{\eta}_{1k}) + G_{1p_0}(D - p_0)] + o_P(1) \\ &= \frac{1}{\sqrt{N}} \sum_{i=1}^N [\psi_1(W_i, \theta_0, p_0, \eta_{10}) + G_{1p_0}(D_i - p_0)] + \sqrt{N} R_N + o_P(1), \end{aligned}$$

where

$$\begin{aligned} R_N &= \frac{1}{K} \sum_{k=1}^K \mathbb{E}_{n,k} [\psi_1(W, \theta_0, p_0, \hat{\eta}_{1k}) + G_{1p_0}(D - p_0)] \\ &\quad - \frac{1}{N} \sum_{i=1}^N [\psi_1(W_i, \theta_0, p_0, \eta_{10}) + G_{1p_0}(D_i - p_0)] \\ &= \frac{1}{K} \sum_{k=1}^K \mathbb{E}_{n,k} [\psi_1(W, \theta_0, p_0, \hat{\eta}_{1k})] - \frac{1}{N} \sum_{i=1}^N \psi_1(W_i, \theta_0, p_0, \eta_{10}). \end{aligned}$$

It remains to show that  $\sqrt{N}R_N = o_P(1)$ .

This part is essentially identical to Step 3 in the proof of Theorem 3.1 in Chernozhukov et al. (2018). I reproduce it here for the reader's convenience. Because  $K$  is a fixed integer, which is independent of  $N$ , it suffices to show that for any  $k \in [K]$ ,

$$\mathbb{E}_{n,k} [\psi_1(W, \theta_0, p_0, \hat{\eta}_{1k})] - \frac{1}{n} \sum_{i \in I_k} \psi_1(W_i, \theta_0, p_0, \eta_{10}) = o_P(N^{-1/2}).$$

Define the empirical process notation:

$$\mathbb{G}_{n,k}[\phi(W)] = \frac{1}{\sqrt{n}} \sum_{i \in I_k} \left( \phi(W_i) - \int \phi(w) dP \right),$$

where  $\phi$  is any  $P$ -integrable function on  $\mathcal{W}$ . By the triangle inequality, we have

$$\| \mathbb{E}_{n,k} [\psi_1(W, \theta_0, p_0, \hat{\eta}_{1k})] - \frac{1}{n} \sum_{i \in I_k} \psi_1(W_i, \theta_0, p_0, \eta_{10}) \| \leq \frac{I_{1,k} + I_{2,k}}{\sqrt{n}},$$

where

$$\begin{aligned} I_{1,k} &\equiv \| \mathbb{G}_{n,k} [\psi_1(W, \theta_0, p_0, \hat{\eta}_{1k})] - \mathbb{G}_{n,k} [\psi_1(W, \theta_0, p_0, \eta_{10})] \|, \\ I_{2,k} &\equiv \sqrt{n} \| E_P \left[ \psi_1(W, \theta_0, p_0, \hat{\eta}_{1k}) \mid (W_i)_{i \in I_k^c} \right] - E_P [\psi_1(W, \theta_0, p_0, \eta_{10})] \|. \end{aligned}$$

To bound  $I_{1,k}$ , note that conditional on  $(W_i)_{i \in I_k^c}$ , the estimator  $\hat{\eta}_{1k}$  is nonstochastic. Under the event that  $\hat{\eta}_{1k} \in \mathcal{T}_N$ , we have

$$\begin{aligned} E_P \left[ I_{1,k}^2 \mid (W_i)_{i \in I_k^c} \right] &= E_P \left[ \|\psi_1(W, \theta_0, p_0, \hat{\eta}_{1k}) - \psi_1(W, \theta_0, p_0, \eta_{10})\|^2 \mid (W_i)_{i \in I_k^c} \right] \\ &\leq \sup_{\eta_1 \in \mathcal{T}_N} E_P \left[ \|\psi_1(W, \theta_0, p_0, \eta_1) - \psi_1(W, \theta_0, p_0, \eta_{10})\|^2 \mid (W_i)_{i \in I_k^c} \right] \\ &= \sup_{\eta_1 \in \mathcal{T}_N} E_P \left[ \|\psi_1(W, \theta_0, p_0, \eta_1) - \psi_1(W, \theta_0, p_0, \eta_{10})\|^2 \right] \\ &= (\varepsilon_N)^2 \end{aligned}$$

by (A.1). Hence,  $I_{1,k} = O_P(\varepsilon_N)$  by Lemma A.1. To bound  $I_{2,k}$ , define the following function

$$f_k(r) = E_P \left[ \psi_1(W, \theta_0, p_0, \eta_{10} + r(\hat{\eta}_{1k} - \eta_{10})) \mid (W_i)_{i \in I_k^c} \right] - E[\psi_1(W, \theta_0, p_0, \eta_{10})]$$

for  $r \in [0, 1)$ . By Taylor series expansion, we have

$$f_k(1) = f_k(0) + f'_k(0) + f''_k(\tilde{r})/2, \text{ for some } \tilde{r} \in (0, 1).$$

Note that  $f_k(0) = 0$  because  $E[\psi_1(W, \theta_0, p_0, \eta_{10}) \mid (W_i)_{i \in I_k^c}] = E[\psi_1(W, \theta_0, p_0, \eta_{10})]$ . Furthermore, on the event  $\hat{\eta}_{1k} \in \mathcal{T}_N$ ,

$$\|f'_k(0)\| = \|\partial_{\eta_1} E_P \psi_1(W, \theta_0, p_0, \eta_{10})[\hat{\eta}_{1k} - \eta_{10}]\| = 0$$

by the orthogonality of  $\psi_1$ . Also, on the event  $\hat{\eta}_{1k} \in \mathcal{T}_N$ ,

$$\|f''_k(\tilde{r})\| \leq \sup_{r \in (0,1)} \|f''_k(r)\| \leq (\varepsilon_N)^2$$

by (A.2). Thus,

$$I_{2,k} = \sqrt{n} \|f_k(1)\| = O_P(\sqrt{n}(\varepsilon_N)^2).$$

Together with the result on  $I_{1,k}$ , we have

$$\begin{aligned} \mathbb{E}_{n,k}[\psi_1(W, \theta_0, p_0, \hat{\eta}_{1k})] - \frac{1}{n} \sum_{i \in I_k} \psi_1(W_i, \theta_0, p_0, \eta_{10}) &\leq \frac{I_{1,k} + I_{2,k}}{\sqrt{n}} \\ &= O_P(n^{-1/2}\varepsilon_N + (\varepsilon_N)^2) \\ &= o_P(N^{-1/2}) \end{aligned}$$

by  $n = O(N)$  and  $\varepsilon_N = o(N^{-1/4})$ . Hence,  $\sqrt{N}R_N = o_P(1)$ .

*Step 2.* In this step, I present the proof of (A.1). We have the following decomposition:

$$\begin{aligned} \psi_1(W, \theta_0, p_0, \eta_1) - \psi_1(W, \theta_0, p_0, \eta_{10}) &= \frac{D - g(X)}{p_0(1 - g(X))} (Y(1) - Y(0) - \ell_1(X)) \\ &\quad - \frac{D - g_0(X)}{p_0(1 - g_0(X))} (Y(1) - Y(0) - \ell_{10}(X)) \\ &= \frac{U + g_0(X) - g(X)}{p_0(1 - g(X))} (V_1 + \ell_{10}(X) - \ell_1(X)) \\ &\quad - \frac{UV_1}{p_0(1 - g_0(X))}. \end{aligned}$$



Thus, we have

$$\begin{aligned} \psi_1(W, \theta_0, p_0, \eta_1) - \psi_1(W, \theta_0, p_0, \eta_{10}) &= \frac{UV_1}{p_0(1-g(X))} + \frac{U(\ell_{10}(X) - \ell_1(X))}{p_0(1-g(X))} \\ &+ \frac{(g_0(X) - g(X))V_1}{p_0(1-g(X))} - \frac{UV_1}{p_0(1-g_0(X))} \\ &+ \frac{(g_0(X) - g(X))(\ell_{10}(X) - \ell_1(X))}{p_0(1-g(X))}. \end{aligned}$$

Given  $\kappa \leq g_0(X) \leq 1 - \kappa$  and  $\kappa \leq g(X) \leq 1 - \kappa$ ,

$$\begin{aligned} \|\psi_1(W, \theta_0, p_0, \eta_1) - \psi_1(W, \theta_0, p_0, \eta_{10})\|_{P,2} &\leq \frac{1}{p_0\kappa^2} \|UV_1(1-g_0(X)) \\ &+ U(\ell_{10}(X) - \ell_1(X))(1-g_0(X)) \\ &+ V_1(g_0(X) - g(X))(1-g_0(X)) \\ &+ (g_0 - g)(\ell_{10} - \ell_1)(1-g_0(X)) \\ &- UV_1(1-g(X))\|_{P,2}. \end{aligned}$$

By  $\kappa \leq g_0(X) \leq 1 - \kappa$  and  $\kappa \leq g(X) \leq 1 - \kappa$  again, we can obtain

$$\begin{aligned} \|\psi_1(W, \theta_0, p_0, \eta_1) - \psi_1(W, \theta_0, p_0, \eta_{10})\|_{P,2} &\leq \frac{1-\kappa}{p_0\kappa^2} \|UV_1 + U(\ell_{10}(X) - \ell_1(X)) \\ &+ V_1(g_0(X) - g(X)) \\ &+ (g_0(X) - g(X))(\ell_{10}(X) - \ell_1(X)) \\ &- UV_1\|_{P,2}. \end{aligned}$$

Thus, by  $E_P[U^2|X] \leq C$  and  $E_P[V_1^2|X] \leq C$ ,

$$\begin{aligned} \|\psi_1(W, \theta_0, p_0, \eta_1) - \psi_1(W, \theta_0, p_0, \eta_{10})\|_{P,2} &\leq \frac{(1-\kappa)\sqrt{C}}{p_0\kappa^2} \|\ell_{10} - \ell_1\|_{P,2} \\ &+ \frac{(1-\kappa)\sqrt{C}}{p_0\kappa^2} \|g_0 - g\|_{P,2} \\ &+ \frac{(1-\kappa)}{p_0\kappa^2} \|g_0 - g\|_{P,2} \|\ell_{10} - \ell_1\|_{P,2} \\ &\leq O(\varepsilon_N + \varepsilon_N + (\varepsilon_N)^2) \\ &= O(\varepsilon_N). \end{aligned}$$

*Step 3.* In this step, I present the proof of (A.2). Define

$$f(r) = E_P[\psi_1(W, \theta_0, p_0, \eta_{10} + r(\eta_1 - \eta_{10}))].$$

Then, its second-order derivative is

$$\begin{aligned} \partial_r^2 f(r) &= \frac{2}{p_0} E_P \left[ \frac{(D-1)(g-g_0)^2}{(1-g_0-r(g-g_0))^3} (Y(1) - Y(0) - \ell_{10} - r(\ell_1 - \ell_{10})) \right] \\ &- \frac{2}{p_0} E_P \left[ \frac{D-1}{(1-g_0-r(g-g_0))^2} (\ell_1 - \ell_{10})(g-g_0) \right]. \end{aligned}$$

It follows that

$$|\partial_r^2 f(r)| \leq O(\|(g-g_0)\|_{P,2}^2 + \|(g-g_0)\|_{P,2} \times \|(\ell_1 - \ell_{10})\|_{P,2}) \leq (\varepsilon_N)^2.$$

Step 4. Notice that

$$\begin{aligned}\partial_p \psi_1(W, \theta, p, \eta_1) &= -\frac{1}{p} \frac{D - g(X)}{1 - g(X)} (Y(1) - Y(0) - \ell_1(X)) \\ &= -\frac{1}{p} (\psi_1(W, \theta, p, \eta_1) + \theta),\end{aligned}$$

and then, we have

$$\begin{aligned}&\| \partial_p \psi_1(W, \theta_0, p_0, \eta_1) - \partial_p \psi_1(W, \theta_0, p_0, \eta_{10}) \|_{p,2} \\ &= \frac{1}{p_0} \| \psi_1(W, \theta_0, p_0, \eta_1) - \psi_1(W, \theta_0, p_0, \eta_{10}) \|_{p,2} \\ &= O(\varepsilon_N)\end{aligned}$$

by Step 2.

Step 5. Notice that

$$\begin{aligned}\partial_p^2 \psi_1(W, \theta, p, \eta_1) &= \frac{2}{p^3} \frac{D - g(X)}{1 - g(X)} (Y(1) - Y(0) - \ell_1(X)) \\ &= \frac{2}{p^2} (\psi_1(W, \theta, p, \eta_1) + \theta),\end{aligned}$$

and then, we have

$$\begin{aligned}\partial_p^2 \psi_1(W, \theta_0, p, \eta_1) - \partial_p^2 \psi_1(W, \theta_0, p_0, \eta_{10}) &= \partial_{\bar{p}}^2 \psi_1(W, \theta_0, p_0, \eta_1) - \partial_p^2 \psi_1(W, \theta_0, p_0, \eta_{10}) \\ &\quad + \partial_{\bar{p}^3}^3 \psi_1(W, \theta_0, \bar{p}, \eta_1) (p - p_0) \\ &= \frac{2}{p_0^2} (\psi_1(W, \theta_0, p_0, \eta_1) - \psi_1(W, \theta_0, p_0, \eta_{10})) \\ &\quad - \frac{6}{\bar{p}^4} \frac{(D - g(X))(Y(1) - Y(0) - \ell_1(X))}{1 - g(X)} \\ &\quad \times (p - p_0),\end{aligned}$$

where  $\bar{p} \in (p, p_0)$ . Thus,  $\| \partial_p^2 \psi_1(W, \theta_0, p, \eta_1) - \partial_p^2 \psi_1(W, \theta_0, p_0, \eta_{10}) \|_{p,2}$  is bounded by

$$\begin{aligned}&\frac{2}{p_0^2} \| \psi_1(W, \theta_0, p_0, \eta_1) - \psi_1(W, \theta_0, p_0, \eta_{10}) \|_{p,2} \\ &+ \| \frac{6}{\bar{p}^4} \frac{D - g(X)}{1 - g(X)} (Y(1) - Y(0) - \ell_1(X)) \|_{p,2} \times |p - p_0|.\end{aligned}$$

The term in the second line is bounded by

$$\begin{aligned}
\frac{6}{\bar{p}^{4\kappa}} \|(U + g_0 - g)(V_1 + \ell_{10} - \ell_1)\|_{P,2} &\leq \frac{6}{\bar{p}^{4\kappa}} \|UV_1\|_{P,2} + \frac{6}{\bar{p}^{4\kappa}} \|U(\ell_{10} - \ell_1)\|_{P,2} \\
&\quad + \frac{6}{\bar{p}^{4\kappa}} \|V_1(g_0 - g)\|_{P,2} \\
&\quad + \frac{6}{\bar{p}^{4\kappa}} \|g_0 - g\|_{P,2} \|\ell_{10} - \ell_1\|_{P,2} \\
&\leq \frac{6}{\bar{p}^{4\kappa}} \left( C + \sqrt{C} \|\ell_{10} - \ell_1\|_{P,2} \right) \\
&\quad + \frac{6}{\bar{p}^{4\kappa}} \sqrt{C} \|g_0 - g\|_{P,2} \\
&\quad + \frac{6}{\bar{p}^{4\kappa}} \|g_0 - g\|_{P,2} \|\ell_{10} - \ell_1\|_{P,2} \\
&= O(1)
\end{aligned}$$

by  $\|UV_1\|_{P,2} \leq \|UV_1\|_{P,4} \leq C$ ,  $E_P[U^2|X] \leq C$ ,  $E_P[V_1^2|X] \leq C$ , and the conditions on the rates of convergence. Together with Step 2, we obtain

$$\begin{aligned}
\|\partial_p^2 \psi_1(W, \theta_0, p, \eta_1) - \partial_p^2 \psi_1(W, \theta_0, p_0, \eta_{10})\|_{P,2} &\leq O(\varepsilon_N) + O(1) \times O(N^{-1/2}) \\
&= O(\varepsilon_N),
\end{aligned}$$

where I assume that  $\varepsilon_N$  converges to zero no faster than  $N^{-1/2}$ .

### Repeated cross sections:

In Step 1, I show the main result with the following auxiliary results:

$$\sup_{\eta_2 \in \mathcal{T}_N} \left( E \left[ \|\psi_2(W, \theta_0, p_0, \lambda_0, \eta_2) - \psi_2(W, \theta_0, p_0, \lambda_0, \eta_{20})\|^2 \right] \right)^{1/2} \leq \varepsilon_N, \quad (\text{A.5})$$

$$\sup_{r \in (0,1), \eta_2 \in \mathcal{T}_N} \|\partial_r^2 E[\psi_2(W, \theta_0, p_0, \lambda_0, \eta_{20} + r(\eta_2 - \eta_{20}))]\| \leq (\varepsilon_N)^2. \quad (\text{A.6})$$

$$\sup_{\eta_2 \in \mathcal{T}_N} \left( E_P \left[ \|\partial_p \psi_2(W, \theta_0, p_0, \lambda_0, \eta_2) - \partial_p \psi_2(W, \theta_0, p_0, \lambda_0, \eta_{20})\|^2 \right] \right)^{1/2} \leq \varepsilon_N, \quad (\text{A.7})$$

$$\sup_{\eta_2 \in \mathcal{T}_N} \left( E_P \left[ \|\partial_\lambda \psi_2(W, \theta_0, p_0, \lambda_0, \eta_2) - \partial_\lambda \psi_2(W, \theta_0, p_0, \lambda_0, \eta_{20})\|^2 \right] \right)^{1/2} \leq \varepsilon_N, \quad (\text{A.8})$$

$$\sup_{p \in \mathcal{P}_N, \eta_2 \in \mathcal{T}_N} \left( E_P \left[ \|\partial_p^2 \psi_2(W, \theta_0, p, \lambda_0, \eta_2) - \partial_p^2 \psi_2(W, \theta_0, p_0, \lambda_0, \eta_{20})\|^2 \right] \right)^{1/2} \leq \varepsilon_N, \quad (\text{A.9})$$

$$\sup_{p \in \mathcal{P}_N, \lambda \in \Lambda_N, \eta_2 \in \mathcal{T}_N} \left( E_P \left[ \|\partial_\lambda^2 \psi_2(W, \theta_0, p, \lambda, \eta_2) - \partial_\lambda^2 \psi_2(W, \theta_0, p_0, \lambda_0, \eta_{20})\|^2 \right] \right)^{1/2} \leq \varepsilon_N, \quad (\text{A.10})$$

$$\sup_{p \in \mathcal{P}_N, \eta_2 \in \mathcal{T}_N} \left( E_P \left[ \|\partial_\lambda \partial_p \psi_2(W, \theta_0, p, \lambda_0, \eta_2) - \partial_\lambda \partial_p \psi_2(W, \theta_0, p_0, \lambda_0, \eta_{20})\|^2 \right] \right)^{1/2} \leq \varepsilon_N, \quad (\text{A.11})$$

where  $\mathcal{T}_N$  is the set of all  $\eta_2 = (g, \ell_2)$  consisting of  $P$ -square-integrable functions  $g$  and  $\ell_2$ , such that

$$\|\eta_2 - \eta_{20}\|_{P,2} \leq \varepsilon_N,$$

$$\|g - 1/2\|_{P,\infty} \leq 1/2 - \kappa,$$

$$\|(g - g_0)\|_{P,2}^2 + \|(g - g_0)\|_{P,2} \times \|(\ell_2 - \ell_{20})\|_{P,2} \leq (\varepsilon_N)^2,$$

and  $\mathcal{P}_N$  and  $\Lambda_N$  are the sets consisting of all  $p > 0$  and  $\lambda > 0$ , such that  $|p - p_0| \leq N^{-1/2}$  and  $|\lambda - \lambda_0| \leq N^{-1/2}$ , respectively. By the regularity condition (3.2),  $|\hat{p}_k - p_0| = O_P(N^{-1/2})$ , and  $|\hat{\lambda}_k - \lambda_0| = O_P(N^{-1/2})$ , we have  $\hat{\eta}_{2k} \in \mathcal{T}_N$ ,  $\hat{p}_k \in \mathcal{P}_N$ , and  $\hat{\lambda}_k \in \Lambda_N$  with probability  $1 - o(1)$ .

In Steps 2 through 4, I show the above auxiliary results.

*Step 1.* Notice that

$$\begin{aligned} \sqrt{N}(\tilde{\theta} - \theta_0) &= \sqrt{N} \left( \frac{1}{K} \sum_{k=1}^K \tilde{\theta}_k - \theta_0 \right) \\ &= \sqrt{N} \frac{1}{K} \sum_{k=1}^K \mathbb{E}_{n,k} [\psi_2(W, \theta_0, \hat{p}_k, \hat{\lambda}_k, \hat{\eta}_{2k})] \\ &= \sqrt{N} \frac{1}{K} \sum_{k=1}^K \mathbb{E}_{n,k} [\psi_2(W, \theta_0, p_0, \lambda_0, \hat{\eta}_{2k})] \\ &\quad + \sqrt{N} \frac{1}{K} \sum_{k=1}^K \mathbb{E}_{n,k} [\partial_p \psi_2(W, \theta_0, p_0, \lambda_0, \hat{\eta}_{2k})] (\hat{p}_k - p_0) \\ &\quad + \sqrt{N} \frac{1}{K} \sum_{k=1}^K \mathbb{E}_{n,k} [\partial_\lambda \psi_2(W, \theta_0, p_0, \lambda_0, \hat{\eta}_{2k})] (\hat{\lambda}_k - \lambda_0) + o_P(1), \end{aligned}$$

where the term  $o_P(1)$ , by the same arguments for the term  $b$  in repeated outcomes and the auxiliary results (A.9) through (A.11), contains the second-order terms

$$\begin{aligned} &\sqrt{N} \frac{1}{K} \sum_{k=1}^K \mathbb{E}_{n,k} [\partial_p^2 \psi_2(W, \theta_0, \bar{p}_k, \lambda_0, \hat{\eta}_{2k})] (\hat{p}_k - p_0)^2, \\ &\sqrt{N} \frac{1}{K} \sum_{k=1}^K \mathbb{E}_{n,k} [\partial_\lambda^2 \psi_2(W, \theta_0, \hat{p}_k, \bar{\lambda}_k, \hat{\eta}_{2k})] (\hat{\lambda}_k - \lambda_0)^2, \\ &\sqrt{N} \frac{1}{K} \sum_{k=1}^K \mathbb{E}_{n,k} [\partial_\lambda \partial_p \psi_2(W, \theta_0, \bar{p}_k, \lambda_0, \hat{\eta}_{2k})] (\hat{\lambda}_k - \lambda_0) (\hat{p}_k - p_0), \end{aligned}$$

where  $\bar{p}_k \in (\hat{p}_k, p_0)$  and  $\bar{\lambda}_k \in (\hat{\lambda}_k, \lambda_0)$ . On the other hand, by the same arguments for the term  $a$  in repeated outcomes and the auxiliary results (A.7) and (A.8), we have

$$\mathbb{E}_{n,k} [\partial_p \psi_2(W, \theta_0, p_0, \lambda_0, \hat{\eta}_{2k})] \xrightarrow{P} E_p [\partial_p \psi_2(W, \theta_0, p_0, \lambda_0, \eta_{20})] = G_{2p0},$$

$$\mathbb{E}_{n,k} [\partial_\lambda \psi_2(W, \theta_0, p_0, \lambda_0, \hat{\eta}_{2k})] \xrightarrow{P} E_p [\partial_\lambda \psi_2(W, \theta_0, p_0, \lambda_0, \eta_{20})] = G_{2\lambda 0}.$$

Hence, because  $\hat{p}_k - p_0 = \mathbb{E}_{n,k} [D - p_0]$  and  $\hat{\lambda}_k - \lambda_0 = \mathbb{E}_{n,k} [T - \lambda_0]$ , we have

$$\begin{aligned} \sqrt{N}(\tilde{\theta} - \theta_0) &= \sqrt{N} \frac{1}{K} \sum_{k=1}^K \mathbb{E}_{n,k} [\psi_2(W, \theta_0, p_0, \lambda_0, \hat{\eta}_{2k})] \\ &= \sqrt{N} \frac{1}{K} \sum_{k=1}^K \mathbb{E}_{n,k} [\psi_2(W, \theta_0, p_0, \lambda_0, \hat{\eta}_{1k}) + G_{2p0}(D - p_0) + G_{2\lambda 0}(T - \lambda_0)] \\ &\quad + o_P(1) \\ &= \frac{1}{\sqrt{N}} \sum_{i=1}^N [\psi_2(W_i, \theta_0, p_0, \lambda_0, \eta_{20}) + G_{2p0}(D_i - p_0) + G_{2\lambda 0}(T_i - \lambda_0)] \\ &\quad + \sqrt{N} R'_N + o_P(1), \end{aligned}$$

where

$$\begin{aligned}
R'_N &= \frac{1}{K} \sum_{k=1}^K \mathbb{E}_{n,k} [\psi_2(W, \theta_0, p_0, \lambda_0, \hat{\eta}_{2k}) + G_{2p_0}(D - p_0) + G_{2\lambda_0}(T - \lambda_0)] \\
&\quad - \frac{1}{N} \sum_{i=1}^N [\psi_2(W_i, \theta_0, p_0, \lambda_0, \eta_{20}) + G_{2p_0}(D_i - p_0) + G_{2\lambda_0}(T_i - \lambda_0)] \\
&= \frac{1}{K} \sum_{k=1}^K \mathbb{E}_{n,k} [\psi_2(W, \theta_0, p_0, \lambda_0, \hat{\eta}_{2k})] - \frac{1}{N} \sum_{i=1}^N \psi_2(W_i, \theta_0, p_0, \lambda_0, \eta_{10}).
\end{aligned}$$

Using (A.5) and (A.6) and the same arguments as for Step 1 in repeated outcomes, one can show that  $\sqrt{N}R'_N = o_p(1)$ . Hence, it remains to prove the auxiliary results (A.5) through (A.11).

*Step 2.* Recall that  $p'_0 = p_0\lambda_0(1 - \lambda_0)$ . For (A.5), notice that

$$\begin{aligned}
\psi_2(W, \theta_0, p_0, \lambda_0, \eta_2) - \psi_2(W, \theta_0, p_0, \lambda_0, \eta_{20}) &= \frac{D - g(X)}{p'_0(1 - g(X))} ((T - \lambda_0)Y - \ell_2(X)) \\
&\quad - \frac{D - g_0(X)}{p'_0(1 - g_0(X))} ((T - \lambda_0)Y - \ell_{20}(X)) \\
&= \frac{U + g_0(X) - g(X)}{p'_0(1 - g(X))} (V_2 + \ell_{20}(X) - \ell_2(X)) \\
&\quad - \frac{UV_2}{p'_0(1 - g_0(X))}.
\end{aligned}$$

The decomposition becomes

$$\begin{aligned}
\psi_2(W, \theta_0, p_0, \lambda_0, \eta_2) - \psi_2(W, \theta_0, p_0, \lambda_0, \eta_{20}) &= \frac{UV_2}{p'_0(1 - g(X))} + \frac{U(\ell_{20}(X) - \ell_2(X))}{p'_0(1 - g(X))} \\
&\quad + \frac{(g_0(X) - g(X))V_2}{p'_0(1 - g(X))} \\
&\quad + \frac{(g_0(X) - g(X))(\ell_{20}(X) - \ell_2(X))}{p'_0(1 - g(X))} \\
&\quad - \frac{UV_2}{p'_0(1 - g_0(X))}.
\end{aligned}$$

Given that  $\kappa \leq g_0(X) \leq 1 - \kappa$ ,  $\kappa \leq g(X) \leq 1 - \kappa$ , we have

$$\begin{aligned}
\| \psi_2(W, \theta_0, p_0, \lambda_0, \eta_2) - \psi_2(W, \theta_0, p_0, \lambda_0, \eta_{20}) \|_{P,2} &\leq \frac{1}{p'_0\kappa^2} \| UV_2(1 - g_0(X)) \\
&\quad + U(\ell_{20}(X) - \ell_2(X))(1 - g_0(X)) \\
&\quad + V_2(g_0(X) - g(X))(1 - g_0(X)) \\
&\quad + (g_0 - g)(\ell_{20} - \ell_2)(1 - g_0(X)) \\
&\quad - UV_2(1 - g(X)) \|_{P,2}.
\end{aligned}$$

By  $\kappa \leq g_0(X) \leq 1 - \kappa$ ,  $\kappa \leq g(X) \leq 1 - \kappa$  again, we obtain

$$\begin{aligned} \|\psi_2(W, \theta_0, p_0, \lambda_0, \eta_2) - \psi_2(W, \theta_0, p_0, \lambda_0, \eta_{20})\|_{P,2} &\leq \frac{1 - \kappa}{p'_0 \kappa^2} \|UV_2 \\ &\quad + U(\ell_{20}(X) - \ell_2(X)) \\ &\quad + V_2(g_0(X) - g(X)) \\ &\quad + (g_0 - g)(\ell_{20} - \ell_2) \\ &\quad - UV_2\|_{P,2}. \end{aligned}$$

Given  $E_P[U^2|X] \leq C$ ,  $E_P[V_2^2|X] \leq C$ , and the conditions on the rates of convergence,

$$\begin{aligned} \|\psi_2(W, \theta_0, p_0, \lambda_0, \eta_2) - \psi_2(W, \theta_0, p_0, \lambda_0, \eta_{20})\|_{P,2} &\leq \frac{(1 - \kappa)\sqrt{C}}{p'_0 \kappa^2} \|\ell_{20}(X) - \ell_2(X)\|_{P,2} \\ &\quad + \frac{(1 - \kappa)\sqrt{C}}{p'_0 \kappa^2} \|g_0(X) - g(X)\|_{P,2} \\ &\quad + \frac{(1 - \kappa)}{p'_0 \kappa^2} \|g_0 - g\|_{P,2} \|\ell_{20} - \ell_2\|_{P,2} \\ &\leq O(\varepsilon_N + \varepsilon_N + (\varepsilon_N)^2) \\ &= O(\varepsilon_N). \end{aligned}$$

For (A.6), let  $f(r) = E_P[\psi_2(W, \theta_0, p_0, \lambda_0, \eta_{20} + r(\eta_2 - \eta_{20}))]$ . Then, the second-order derivative is

$$\begin{aligned} \partial_r^2 f(r) &= \frac{2}{p'_0} E_P \left[ \frac{(D - 1)(g - g_0)^2}{(1 - g_0 - r(g - g_0))^3} ((T - \lambda_0)Y - \ell_{20} - r(\ell_2 - \ell_{20})) \right] \\ &\quad - \frac{2}{p'_0} E_P \left[ \frac{D - 1}{(1 - g_0 - r(g - g_0))^2} (\ell_2 - \ell_{20})(g - g_0) \right]. \end{aligned}$$

It follows that

$$|\partial_r^2 f(r)| \leq O(\|(g - g_0)\|_{P,2}^2 + \|(g - g_0)\|_{P,2} \times \|(\ell_2 - \ell_{20})\|_{P,2}) \leq (\varepsilon_N)^2.$$

*Step 3.* For (A.7), notice that

$$\begin{aligned} \partial_p \psi_2(W, \theta, p, \lambda, \eta_2) &= -\frac{1}{p^2 \lambda (1 - \lambda)} \frac{D - g(X)}{1 - g(X)} ((T - \lambda)Y - \ell_2(X)) \\ &= -\frac{1}{p} (\psi_2(W, \theta, p, \lambda, \eta_2) + \theta), \end{aligned}$$

and then, we have

$$\begin{aligned} \|\partial_p \psi_2(W, \theta_0, p_0, \lambda_0, \eta_2) - \partial_p \psi_2(W, \theta_0, p_0, \lambda_0, \eta_{20})\|_{P,2} &= \frac{1}{p_0} \|\psi_2(W, \theta_0, p_0, \lambda_0, \eta_2) \\ &\quad - \psi_2(W, \theta_0, p_0, \lambda_0, \eta_{20})\|_{P,2} \\ &= O(\varepsilon_N) \end{aligned}$$

by the proof of (A.5).

For (A.8), notice that

$$\begin{aligned} \partial_\lambda \psi_2(W, \theta, p, \lambda, \eta_2) &= -\frac{1 - 2\lambda}{\lambda^2 (1 - \lambda)^2} \frac{D - g(X)}{p(1 - g(X))} ((T - \lambda)Y - \ell_2(X)) \\ &\quad - \frac{Y}{p\lambda(1 - \lambda)} \frac{D - g(X)}{1 - g(X)}. \end{aligned}$$

Define  $\partial_\lambda \psi_{20} \equiv \partial_\lambda \psi_2(W, \theta_0, p_0, \lambda_0, \eta_{20})$ . Then,

$$\begin{aligned}
\| \partial_\lambda \psi_2(W, \theta_0, p_0, \lambda_0, \eta_2) - \partial_\lambda \psi_{20} \|_{P,2} &= \| \psi_2(W, \theta_0, p_0, \lambda_0, \eta_2) - \psi_2(W, \theta_0, p_0, \lambda_0, \eta_{20}) \|_{P,2} \\
&\quad \times \frac{|1 - 2\lambda_0|}{\lambda_0(1 - \lambda_0)} \\
&\quad + \left\| \frac{Y}{p'_0} \left( \frac{D - g(X)}{1 - g(X)} - \frac{D - g_0(X)}{1 - g_0(X)} \right) \right\|_{P,2} \\
&= O(\varepsilon_N) + \left\| \frac{Y}{p'_0} \left( \frac{D - g(X)}{1 - g(X)} - \frac{D - g_0(X)}{1 - g_0(X)} \right) \right\|_{P,2} \\
&\leq O(\varepsilon_N) + \frac{1}{p'_0 \kappa^2} \| Y(g - g_0)(D - 1) \|_{P,2} \\
&\leq O(\varepsilon_N) + \frac{\sqrt{C}}{p'_0 \kappa^2} \| g - g_0 \|_{P,2} \\
&= O(\varepsilon_N),
\end{aligned}$$

by (A.5) and  $E_P[Y^2|X] \leq C$ .

*Step 4.* For (A.9), notice that we have

$$\partial_p^2 \psi_2(W, \theta, p, \lambda, \eta_2) = \frac{2}{p^3 \lambda (1 - \lambda)} \frac{D - g(X)}{1 - g(X)} ((T - \lambda)Y - \ell_2(X)).$$

Define  $\partial_p^2 \psi_{20} \equiv \partial_p^2 \psi_2(W, \theta_0, p_0, \lambda_0, \eta_{20})$ . Then, we have

$$\begin{aligned}
\partial_p^2 \psi_2(W, \theta_0, p, \lambda_0, \eta_2) - \partial_p^2 \psi_{20} &= \partial_p^2 \psi_2(W, \theta_0, p_0, \lambda_0, \eta_2) - \partial_p^2 \psi_{20} \\
&\quad + \partial_p^3 \psi_2(W, \theta_0, \bar{p}, \lambda_0, \eta_2)(p - p_0) \\
&= \frac{2}{p^2} (\psi_2(W, \theta_0, p_0, \lambda_0, \eta_2) - \psi_2(W, \theta_0, p_0, \lambda_0, \eta_{20})) \\
&\quad + \partial_p^3 \psi_2(W, \theta_0, \bar{p}, \lambda_0, \eta_2)(p - p_0),
\end{aligned}$$

where  $\bar{p} \in (p, p_0)$ . Hence, we have

$$\begin{aligned}
\| \partial_p^2 \psi_2(W, \theta_0, p, \lambda_0, \eta_2) - \partial_p^2 \psi_{20} \|_{P,2} &\leq \frac{2}{p^2} \| \psi_2(W, \theta_0, p_0, \lambda_0, \eta_2) - \psi_2(W, \theta_0, p_0, \lambda_0, \eta_{20}) \| \\
&\quad + \left\| \frac{D - g(X)}{1 - g(X)} ((T - \lambda_0)Y - \ell_2(X)) \right\|_{P,2} \\
&\quad \times \frac{6}{\bar{p}^4 \lambda_0 (1 - \lambda_0)} |p - p_0|.
\end{aligned}$$

By (A.5), we have  $\|\psi_2(W, \theta_0, p_0, \lambda_0, \eta_2) - \psi_2(W, \theta_0, p_0, \lambda_0, \eta_{20})\|_{P,2} = O(\varepsilon_N)$ . The term in the second line is bounded by

$$\begin{aligned} \frac{1}{\kappa} \| (U + g_0 - g)(V_2 + \ell_{20} - \ell_2) \|_{P,2} &\leq \frac{1}{\kappa} \| UV_2 \|_{P,2} + \frac{1}{\kappa} \| U(\ell_{20} - \ell_2) \|_{P,2} \\ &\quad + \frac{1}{\kappa} \| V_2(g_0 - g) \|_{P,2} \\ &\quad + \frac{1}{\kappa} \| g_0 - g \|_{P,2} \| \ell_{20} - \ell_2 \|_{P,2} \\ &\leq \frac{1}{\kappa} \left( C + \sqrt{C} \| \ell_{20} - \ell_2 \|_{P,2} + \sqrt{C} \| g_0 - g \|_{P,2} \right) \\ &\quad + \frac{1}{\kappa} \| g_0 - g \|_{P,2} \| \ell_{20} - \ell_2 \|_{P,2} \\ &= O(1) \end{aligned}$$

by  $\|UV_2\|_{P,2} \leq \|UV_2\|_{P,4} \leq C$ ,  $E_P[U^2|X] \leq C$ , and  $E_P[V_2^2|X] \leq C$ . Thus, we obtain

$$\begin{aligned} \| \partial_p^2 \psi_2(W, \theta_0, p, \lambda_0, \eta_2) - \partial_p^2 \psi_{20} \|_{P,2} &\leq O(\varepsilon_N) + O(1) \times O(N^{-1/2}) \\ &= O(\varepsilon_N), \end{aligned}$$

where I assume that  $\varepsilon_N$  converges to zero no faster than  $N^{-1/2}$ .

For (A.10), notice that we have

$$\begin{aligned} \partial_\lambda^2 \psi_2(W, \theta, p, \lambda, \eta_2) &= \frac{c_1}{p\lambda^3(1-\lambda)^3} \frac{D-g(X)}{1-g(X)} ((T-\lambda)Y - \ell_2(X)) \\ &\quad + \frac{2-4\lambda}{p\lambda^2(1-\lambda)^2} \frac{D-g(X)}{1-g(X)} Y, \end{aligned}$$

where  $c_1$  is a constant depending on  $\lambda$ . Define  $\partial_\lambda^2 \psi_{20} \equiv \partial_\lambda^2 \psi_2(W, \theta_0, p_0, \lambda_0, \eta_{20})$ . Then, we have

$$\begin{aligned} \partial_\lambda^2 \psi_2(W, \theta_0, p, \lambda, \eta_2) - \partial_\lambda^2 \psi_{20} &= \partial_\lambda^2 \psi_2(W, \theta_0, p_0, \lambda_0, \eta_2) - \partial_\lambda^2 \psi_{20} \\ &\quad + \partial_\lambda^2 \partial_p \psi_2(W, \theta_0, \bar{p}, \lambda, \eta_2)(p - p_0) \\ &\quad + \partial_\lambda^3 \psi_2(W, \theta_0, p_0, \bar{\lambda}, \eta_2)(\lambda - \lambda_0) \\ &= \frac{c_1}{\lambda_0^2(1-\lambda_0)^2} (\psi_2(W, \theta_0, p_0, \lambda_0, \eta_2) - \psi_2(W, \theta_0, p_0, \lambda_0, \eta_{20})) \\ &\quad + \frac{2-4\lambda_0}{p_0\lambda_0^2(1-\lambda_0)^2} \left( \frac{D-g(X)}{1-g(X)} - \frac{D-g_0(X)}{1-g_0(X)} \right) Y \\ &\quad + \partial_\lambda^2 \partial_p \psi_2(W, \theta_0, \bar{p}, \lambda, \eta_2)(p - p_0) \\ &\quad + \partial_\lambda^3 \psi_2(W, \theta_0, p_0, \bar{\lambda}, \eta_2)(\lambda - \lambda_0), \end{aligned}$$



where  $\bar{p} \in (p, p_0)$  and  $\bar{\lambda} \in (\lambda, \lambda_0)$ . By the triangle inequality, we have

$$\begin{aligned} \|\partial_\lambda^2 \psi_2(W, \theta_0, p, \lambda, \eta_2) - \partial_\lambda^2 \psi_{20}\|_{P,2} &\leq \frac{|c_1|}{\lambda^2(1-\lambda)^2} \times \\ &\quad \|\psi_2(W, \theta_0, p_0, \lambda_0, \eta_2) - \psi_2(W, \theta_0, p_0, \lambda_0, \eta_{20})\|_{P,2} \\ &\quad + \frac{|2-4\lambda_0|Y}{p_0\lambda_0^2(1-\lambda_0)^2} \left\| \left( \frac{D-g(X)}{1-g(X)} - \frac{D-g_0(X)}{1-g_0(X)} \right) \right\|_{P,2} \\ &\quad + \|\partial_\lambda^2 \partial_p \psi_2(W, \theta_0, \bar{p}, \lambda, \eta_2)\|_{P,2} |p-p_0| \\ &\quad + \|\partial_\lambda^3 \psi_2(W, \theta_0, p_0, \bar{\lambda}, \eta_2)\|_{P,2} |\lambda-\lambda_0|. \end{aligned}$$

The norm term in the second line is bounded by

$$\begin{aligned} \frac{1}{\kappa^2} \|Y(D-1)(g-g_0)\|_{P,2} &\leq \frac{\sqrt{C}}{\kappa^2} \|g-g_0\|_{P,2} \\ &= O(\varepsilon_N), \end{aligned}$$

by  $E_p[Y^2|X] \leq C$  and  $D \in \{0, 1\}$ . The two high-order terms are bounded by

$$\begin{aligned} \|\partial_\lambda^2 \partial_p \psi_2(W, \theta_0, \bar{p}, \lambda, \eta_2)\|_{P,2} &\leq \frac{|c_1|}{\bar{p}^2 \lambda^3 (1-\lambda)^3} \left\| \frac{D-g(X)}{1-g(X)} ((T-\lambda)Y - \ell_2(X)) \right\|_{P,2} \\ &\quad + \frac{|2-4\lambda|}{\bar{p}\lambda^2(1-\lambda)^2} \left\| \frac{D-g(X)}{1-g(X)} Y \right\|_{P,2} \end{aligned}$$

and

$$\begin{aligned} \|\partial_\lambda^3 \psi_2(W, \theta_0, p_0, \bar{\lambda}, \eta_2)\|_{P,2} &\leq \frac{|c_2|}{p_0 \bar{\lambda}^4 (1-\bar{\lambda})^4} \left\| \frac{D-g(X)}{1-g(X)} ((T-\bar{\lambda})Y - \ell_2(X)) \right\|_{P,2} \\ &\quad + \frac{|c_3|}{p_0 \bar{\lambda}^3 (1-\bar{\lambda})^3} \left\| \frac{D-g(X)}{1-g(X)} Y \right\|_{P,2}, \end{aligned}$$

where  $c_2$  and  $c_3$  are constants depending on  $\lambda$ . Using the same arguments in (A.9), one can show that

$$\begin{aligned} \left\| \frac{D-g(X)}{1-g(X)} ((T-\lambda)Y - \ell_2(X)) \right\|_{P,2} &\leq O(1), \\ \left\| \frac{D-g(X)}{1-g(X)} ((T-\bar{\lambda})Y - \ell_2(X)) \right\|_{P,2} &\leq O(1). \end{aligned}$$

Also, we have

$$\begin{aligned} \left\| \frac{D-g(X)}{1-g(X)} \times Y \right\|_{P,2} &= \left\| \frac{U+g_0(X)-g(X)}{1-g(X)} \times Y \right\|_{P,2} \\ &\leq \frac{1}{\kappa} (\|UY\|_{P,2} + \|(g_0-g)Y\|_{P,2}) \\ &\leq \frac{1}{\kappa} (C + \sqrt{C} \|g_0-g\|_{P,2}) \\ &= O(1) \end{aligned}$$

by  $\|UY\|_{P,2} \leq C$  and  $E_p[Y^2|X] \leq C$ .

Finally, we obtain

$$\begin{aligned} \|\partial_\lambda^2 \psi_2(W, \theta_0, p, \lambda, \eta_2) - \partial_\lambda^2 \psi_{20}\|_{P,2} &\leq O(\varepsilon_N) + O(\varepsilon_N) + O(1) O(N^{-1/2}) \\ &\quad + O(1) O(N^{-1/2}) \\ &= O(\varepsilon_N), \end{aligned}$$

where I assume that  $\varepsilon_N$  converges to zero no faster than  $N^{-1/2}$ .

For (A.11), notice that the derivative is

$$\begin{aligned} \partial_\lambda \partial_p \psi_2(W, \theta, p, \lambda, \eta_2) &= \frac{1 - 2\lambda}{p^2 \lambda^2 (1 - \lambda)^2} \frac{D - g(X)}{1 - g(X)} ((T - \lambda)Y - \ell_2(X)) \\ &\quad + \frac{Y}{p^2 \lambda (1 - \lambda)} \frac{D - g(X)}{1 - g(X)}. \end{aligned}$$

Define  $\partial_\lambda \partial_p \psi_{20} \equiv \partial_\lambda \partial_p \psi_2(W, \theta_0, p_0, \lambda_0, \eta_{20})$ . Then, we have

$$\begin{aligned} \partial_\lambda \partial_p \psi_2(W, \theta_0, p, \lambda_0, \eta_2) - \partial_\lambda \partial_p \psi_{20} &= \partial_\lambda \partial_p \psi_2(W, \theta_0, p_0, \lambda_0, \eta_2) - \partial_\lambda \partial_p \psi_{20} \\ &\quad + \partial_\lambda \partial_p^2 \psi_2(W, \theta_0, \bar{p}, \lambda_0, \eta_2)(p - p_0), \end{aligned}$$

where  $\bar{p} \in (p, p_0)$ . By the triangle inequality, we obtain

$$\begin{aligned} \|\partial_\lambda \partial_p \psi_2(W, \theta_0, p, \lambda_0, \eta_2) - \partial_\lambda \partial_p \psi_{20}\|_{P,2} &\leq \frac{1}{p} \|\partial_\lambda \psi_2(W, \theta_0, p_0, \lambda_0, \eta_2) - \partial_\lambda \psi_{20}\|_{P,2} \\ &\quad + \|\partial_\lambda \partial_p^2 \psi_2(W, \theta_0, \bar{p}, \lambda_0, \eta_2)\|_{P,2} |p - p_0|. \end{aligned}$$

Using the same arguments in (A.9) and (A.10), one can show that the high-order term is bounded by

$$\begin{aligned} \|\partial_\lambda \partial_p^2 \psi_2(W, \theta_0, \bar{p}, \lambda_0, \eta_2)\|_{P,2} &\leq \left\| \frac{2 - 4\lambda_0}{\bar{p}^3 \lambda_0^2 (1 - \lambda_0)^2} \frac{D - g(X)}{1 - g(X)} ((T - \lambda_0)Y - \ell_2(X)) \right\|_{P,2} \\ &\quad + \left\| \frac{2Y}{\bar{p}^3 \lambda_0 (1 - \lambda_0)} \frac{D - g(X)}{1 - g(X)} \right\|_{P,2} \\ &\leq O(1). \end{aligned}$$

Together with (A.8), we obtain

$$\begin{aligned} \|\partial_\lambda \partial_p \psi_2(W, \theta_0, p, \lambda_0, \eta_2) - \partial_\lambda \partial_p \psi_{20}\|_{P,2} &\leq O(\varepsilon_N) + O(1) O(N^{-1/2}) \\ &= O(\varepsilon_N), \end{aligned}$$

where I assume that  $\varepsilon_N$  converges to zero no faster than  $N^{-1/2}$ . □

**Proof of Theorem 3.2.** In Step 1, I show the main result using the auxiliary results

$$\sup_{p \in \mathcal{P}_N, \eta_1 \in \mathcal{T}_N} (E_P [\|\bar{\psi}_1(W, \theta_0, p, \eta_1) - \bar{\psi}_1(W, \theta_0, p_0, \eta_{10})\|^2])^{1/2} \leq \varepsilon_N, \quad (\text{A.12})$$

$$(E_P [\bar{\psi}_1(W, \theta_0, p_0, \eta_{10})^4])^{1/4} \leq C_1, \quad (\text{A.13})$$

where  $\mathcal{P}_N$  and  $\mathcal{T}_N$  are specified in the proof of Theorem 3.1,  $C_1$  is a constant, and

$$\bar{\psi}_1(W, \theta, p, \eta_1) \equiv \frac{1}{p} \frac{D - g(X)}{1 - g(X)} (Y(1) - Y(0) - \ell_1(X)) - \frac{D\theta}{p}.$$

In fact, we have  $E_P [(\bar{\psi}_1(W, \theta_0, p_0, \eta_{10}))^2] = \Sigma_{10}$ . In Step 2, I show the auxiliary results (A.12) and (A.13).

*Step 1.* Notice that

$$\begin{aligned} \hat{\Sigma}_1 &= \frac{1}{K} \sum_{k=1}^K \mathbb{E}_{n,k} \left[ (\psi_1(W, \tilde{\theta}, \hat{p}_k, \hat{\eta}_{1k}) + \hat{G}_{1p}(D - \hat{p}_k))^2 \right] \\ &= \frac{1}{K} \sum_{k=1}^K \mathbb{E}_{n,k} \left[ \left( \frac{1}{\hat{p}_k} \frac{D - \hat{g}_k(X)}{1 - \hat{g}_k(X)} (Y(1) - Y(0) - \hat{\ell}_{1k}(X)) - \frac{D\tilde{\theta}}{\hat{p}_k} \right)^2 \right] \\ &= \frac{1}{K} \sum_{k=1}^K \mathbb{E}_{n,k} [\bar{\psi}_1(W, \tilde{\theta}, \hat{p}_k, \hat{\eta}_{1k})^2], \end{aligned}$$

where the second equality follows from  $\hat{G}_{1p} = -\tilde{\theta}/\hat{p}_k$ .

Because  $K$  is fixed, and is independent of  $N$ , it suffices to show that for each  $k \in [K]$ ,

$$I_k \equiv |\mathbb{E}_{n,k} [\bar{\psi}_1(W, \tilde{\theta}, \hat{p}_k, \hat{\eta}_{1k})^2] - E_P [\bar{\psi}_1(W, \theta_0, p_0, \eta_{10})^2]| = o_P(1).$$

By the triangle inequality, we have

$$I_k \leq I_{3,k} + I_{4,k},$$

where

$$I_{3,k} \equiv |\mathbb{E}_{n,k} [\bar{\psi}_1(W, \tilde{\theta}, \hat{p}_k, \hat{\eta}_{1k})^2] - \mathbb{E}_{n,k} [\bar{\psi}_1(W, \theta_0, p_0, \eta_{10})^2]|,$$

$$I_{4,k} \equiv |\mathbb{E}_{n,k} [\bar{\psi}_1(W, \theta_0, p_0, \eta_{10})^2] - E_P [\bar{\psi}_1(W, \theta_0, p_0, \eta_{10})^2]|.$$

To bound  $I_{4,k}$ , we have

$$\begin{aligned} E_P [I_{4,k}^2] &\leq n^{-1} E_P [\bar{\psi}_1(W, \theta_0, p_0, \eta_{10})^4] \\ &\leq n^{-1} C_1^4, \end{aligned}$$

where the last inequality follows from (A.13). Then, we have  $I_{4,k} = O_P(n^{1/2})$ .

Next, we bound  $I_{3,k}$ . This part is essentially identical to the proof of Theorem 3.2 in Chernozhukov et al. (2018). I reproduce it here for the reader's convenience. Observe that for any number  $a$  and  $\delta a$ ,

$$|(a + \delta a)^2 - a^2| \leq 2(\delta a)(a + \delta a).$$

Denote  $\psi_i = \bar{\psi}_1(W_i, \theta_0, p_0, \eta_{10})$  and  $\hat{\psi}_i = \bar{\psi}_1(W_i, \tilde{\theta}, \hat{p}_k, \hat{\eta}_{1k})$ , and  $a \equiv \psi_i$ ,  $a + \delta a \equiv \hat{\psi}_i$ . Then,

$$\begin{aligned} I_{3,k} &= \left| \frac{1}{n} \sum_{i \in I_k} (\hat{\psi}_i)^2 - (\psi_i)^2 \right| \leq \frac{1}{n} \sum_{i \in I_k} |(\hat{\psi}_i)^2 - (\psi_i)^2| \\ &\leq \frac{2}{n} \sum_{i \in I_k} |\hat{\psi}_i - \psi_i| \times (|\psi_i| + |\hat{\psi}_i - \psi_i|) \\ &\leq \left( \frac{2}{n} \sum_{i \in I_k} |\hat{\psi}_i - \psi_i|^2 \right)^{1/2} \left( \frac{2}{n} \sum_{i \in I_k} (|\psi_i| + |\hat{\psi}_i - \psi_i|)^2 \right)^{1/2} \\ &\leq \left( \frac{2}{n} \sum_{i \in I_k} |\hat{\psi}_i - \psi_i|^2 \right)^{1/2} \left[ \left( \frac{2}{n} \sum_{i \in I_k} |\psi_i|^2 \right)^{1/2} + \left( \frac{2}{n} \sum_{i \in I_k} |\hat{\psi}_i - \psi_i|^2 \right)^{1/2} \right]. \end{aligned}$$

Thus,

$$I_{3,k}^2 \lesssim S_N \times \left( \frac{1}{n} \sum_{i \in I_k} \|\bar{\psi}_1(W_i, \theta_0, p_0, \eta_{10})\|^2 + S_N \right),$$

where

$$S_N \equiv \frac{1}{n} \sum_{i \in I_k} \|\bar{\psi}_1(W_i, \tilde{\theta}, \hat{p}_k, \hat{\eta}_{1k}) - \bar{\psi}_1(W_i, \theta_0, p_0, \eta_{10})\|^2.$$

Because  $\frac{1}{n} \sum_{i \in I_k} \|\bar{\psi}_1(W_i, \theta_0, p_0, \eta_0)\|^2 = O_P(1)$ , it suffices to bound  $S_N$ . We have the decomposition

$$\begin{aligned} S_N &= \frac{1}{n} \sum_{i \in I_k} \|\bar{\psi}_1(W_i, \theta_0, \hat{p}_k, \hat{\eta}_{1k}) + \partial_{\theta} \bar{\psi}_1(W_i, \bar{\theta}, \hat{p}_k, \hat{\eta}_{1k})(\bar{\theta} - \theta_0) - \bar{\psi}_1(W_i, \theta_0, p_0, \eta_{10})\|^2 \\ &= \frac{1}{n} \sum_{i \in I_k} \|\bar{\psi}_1(W_i, \theta_0, \hat{p}_k, \hat{\eta}_{1k}) + \frac{D_i}{\hat{p}_k}(\bar{\theta} - \theta_0) - \bar{\psi}_1(W_i, \theta_0, p_0, \eta_{10})\|^2 \\ &\leq \frac{1}{n} \sum_{i \in I_k} \left\| \frac{D_i}{\hat{p}_k}(\bar{\theta} - \theta_0) \right\|^2 + \frac{1}{n} \sum_{i \in I_k} \|\bar{\psi}_1(W_i, \theta_0, \hat{p}_k, \hat{\eta}_{1k}) - \bar{\psi}_1(W_i, \theta_0, p_0, \eta_{10})\|^2, \end{aligned}$$

where  $\bar{\theta} \in (\bar{\theta} - \theta_0)$ . The first term is bounded by

$$\begin{aligned} \frac{1}{n} \sum_{i \in I_k} \left\| \frac{D_i}{\hat{p}_k}(\bar{\theta} - \theta_0) \right\|^2 &\leq \left( \frac{1}{n} \sum_{i \in I_k} \left( \frac{D_i}{\hat{p}_k} \right)^2 \right) \|\bar{\theta} - \theta_0\|^2 \\ &= \left( \frac{1}{n} \sum_{i \in I_k} \left( \frac{D_i}{p_0} \right)^2 + o_P(1) \right) \|\bar{\theta} - \theta_0\|^2 \\ &= O_P(1) \times O_P(N^{-1}). \end{aligned}$$

Also, notice that conditional on  $(W_i)_{i \in I_k^c}$ , both  $\hat{p}_k$  and  $\hat{\eta}_{1k}$  can be treated as fixed. Under the event that  $\hat{p}_k \in \mathcal{P}_N$  and  $\hat{\eta}_{1k} \in \mathcal{T}_N$ , we have

$$\begin{aligned} &E_P \left[ \|\bar{\psi}_1(W_i, \theta_0, \hat{p}_k, \hat{\eta}_{1k}) - \bar{\psi}_1(W_i, \theta_0, p_0, \eta_{10})\|^2 \mid (W_i)_{i \in I_k^c} \right] \\ &\leq \sup_{p \in \mathcal{P}_N, \eta_1 \in \mathcal{T}_N} E_P \left[ \|\bar{\psi}_1(W_i, \theta_0, p, \eta_1) - \bar{\psi}_1(W_i, \theta_0, p_0, \eta_{10})\|^2 \right] = (\varepsilon_N)^2 \end{aligned}$$

by (A.12). It follows that  $S_N = O_P(N^{-1} + (\varepsilon_N)^2)$ . Therefore, we obtain

$$I_k = O_P(N^{-1/2}) + O_P(N^{-1/2} + \varepsilon_N) = o_P(1).$$

Hence,  $\hat{\Sigma}_1 \xrightarrow{P} \Sigma_{10}$ .

*Step 2.* It remains to prove (A.12) and (A.13). By Taylor series expansion,

$$\begin{aligned} \bar{\psi}_1(W, \theta_0, p, \eta_1) - \bar{\psi}_1(W, \theta_0, p_0, \eta_{10}) &= \bar{\psi}_1(W, \theta_0, p_0, \eta_1) - \bar{\psi}_1(W, \theta_0, p_0, \eta_{10}) \\ &\quad + \partial_p \bar{\psi}_1(W, \theta_0, \bar{p}, \eta_1)(p - p_0) \\ &= \bar{\psi}_1(W, \theta_0, p_0, \eta_1) - \bar{\psi}_1(W, \theta_0, p_0, \eta_{10}) \\ &\quad + \partial_p \bar{\psi}_1(W, \theta_0, \bar{p}, \eta_1)(p - p_0), \end{aligned}$$

where  $\bar{p} \in (p, p_0)$ . Then, we have

$$\begin{aligned} \|\bar{\psi}_1(W, \theta_0, p, \eta_1) - \bar{\psi}_1(W, \theta_0, p_0, \eta_{10})\|_{P,2} &\leq \|\bar{\psi}_1(W, \theta_0, p_0, \eta_1) - \bar{\psi}_1(W, \theta_0, p_0, \eta_{10})\|_{P,2} \\ &\quad + \left\| \frac{1}{\bar{p}^2} \frac{D - g(X)}{1 - g(X)} (Y(1) - Y(0) - \ell_1(X)) \right. \\ &\quad \left. + \frac{D\theta_0}{\bar{p}^2} \right\|_{P,2} \times |p - p_0|. \end{aligned}$$

By (A.1), we have  $\|\psi_1(W, \theta_0, p_0, \eta_1) - \psi_1(W, \theta_0, p_0, \eta_{10})\|_{P,2} = O(\varepsilon_N)$ . The term in the second line is bounded by

$$\begin{aligned}
 & \left\| \frac{1}{\bar{p}^2} \frac{U + g_0 - g}{1 - g} (U + \ell_{10} - \ell_1) \right\|_{P,2} + \left\| \frac{D\theta_0}{\bar{p}^2} \right\|_{P,2} \\
 & \leq \frac{1}{\bar{p}^2 \kappa} \|UV_1\|_{P,2} + \frac{1}{\bar{p}^2 \kappa} \|U(\ell_{10} - \ell_1)\|_{P,2} \\
 & \quad + \frac{1}{\bar{p}^2 \kappa} \|V_1(g_0 - g)\|_{P,2} + \frac{1}{\bar{p}^2} |\theta_0| \\
 & \quad + \frac{1}{\bar{p}^2 \kappa} \|g_0 - g_1\|_{P,2} \|\ell_{10} - \ell_1\|_{P,2} \\
 & \leq \frac{1}{\bar{p}^2 \kappa} \left( C + \sqrt{C} \|\ell_{10} - \ell_1\|_{P,2} + \sqrt{C} \|g_0 - g\|_{P,2} \right) \\
 & \quad + \frac{C}{\bar{p}^2 p_0 \kappa} + \frac{1}{\bar{p}^2 \kappa} \|g_0 - g_1\|_{P,2} \|\ell_{10} - \ell_1\|_{P,2} \\
 & = O(1),
 \end{aligned}$$

where I use  $\|UV_1\|_{P,2} \leq \|UV_1\|_{P,4} \leq C$ ,  $E_P[U^2|X] \leq C$ ,  $E_P[V_1^2|X] \leq C$ , and

$$\begin{aligned}
 |\theta_0| &= \left| E_P \left[ \frac{Y(1) - Y(0)}{p_0} \frac{D - g_0(X)}{1 - g_0(X)} \right] \right| \\
 &\leq \frac{1}{p_0 \kappa} |E_P[(Y(1) - Y(0))U]| \\
 &= \frac{1}{p_0 \kappa} |E_P[(\ell_{10}(X) + V_1)U]| \\
 &= \frac{1}{p_0 \kappa} |E_P[UV_1]| \\
 &\leq \frac{C}{p_0 \kappa}
 \end{aligned}$$

by  $|E_P[UV_1]| \leq \|UV_1\|_{P,4} \leq C$ . Thus, we obtain

$$\begin{aligned}
 \|\bar{\psi}_1(W, \theta_0, p, \eta_1) - \bar{\psi}_1(W, \theta_0, p_0, \eta_{10})\|_{P,2} &\leq O(\varepsilon_N) + O(1) O(N^{-1/2}) \\
 &= O(\varepsilon_N),
 \end{aligned}$$

where I assume that  $\varepsilon_N$  converges to zero no faster than  $N^{-1/2}$ .

For (A.13),

$$\begin{aligned}
 \|\bar{\psi}_1(W, \theta_0, p_0, \eta_{10})\|_{P,4} &= \left\| \frac{1}{p_0} \frac{UV_1}{1 - g_0} - \frac{D\theta_0}{p_0} \right\|_{P,4} \\
 &\leq \left\| \frac{1}{p_0} \frac{UV_1}{1 - g_0} \right\|_{P,4} + \left\| \frac{D\theta_0}{p_0} \right\|_{P,4} \\
 &\leq \frac{1}{p_0 \kappa} \|UV_1\|_{P,4} + \frac{1}{p_0} |\theta_0| \\
 &\leq \frac{C}{p_0 \kappa} + \frac{C}{p_0^2 \kappa}
 \end{aligned}$$

because  $\|UV_1\|_{P,4} \leq C$ .

**Repeated cross sections:**

In Step 1, I show the main result with the auxiliary results:

$$\sup_{p \in \mathcal{P}_N, \lambda \in \Lambda_N, \eta_2 \in \mathcal{T}_N} (E_P [\| \bar{\psi}_2(W, \theta_0, p, \lambda, G_{2\lambda_0}, \eta_2) - \bar{\psi}_2(W, \theta_0, p_0, \lambda_0, G_{2\lambda_0}, \eta_{20}) \|^2])^2 \leq \varepsilon_N, \quad (\text{A.14})$$

$$(E_P [\bar{\psi}_2(W, \theta_0, p_0, \lambda_0, G_{2\lambda_0}, \eta_{20})^4])^{1/4} \leq C_2, \quad (\text{A.15})$$

where  $(\mathcal{P}_N, \Lambda_N, \mathcal{T}_N)$  are specified in the proof of Theorem 3.1,  $C_2$  is a constant, and

$$\bar{\psi}_2(W, \theta, p, \lambda, G_{2\lambda}, \eta_2) \equiv \frac{1}{\lambda(1-\lambda)p} \frac{D-g(X)}{1-g(X)} ((T-\lambda)Y - \ell_2(X)) - \frac{D\theta}{p} + G_{2\lambda}(T-\lambda).$$

In fact, we have  $E_P [(\bar{\psi}_2(W, \theta_0, p_0, \lambda_0, G_{2\lambda_0}, \eta_{20}))^2] = \Sigma_{20}$ . In Step 2, I prove (A.14) and (A.15).

*Step 1.* Notice that

$$\begin{aligned} \hat{\Sigma}_2 &= \frac{1}{K} \sum_{k=1}^K \mathbb{E}_{n,k} \left[ (\psi_2(W, \tilde{\theta}, \hat{p}_k, \hat{\eta}_{1k}) + \hat{G}_{2p}(D - \hat{p}_k) + \hat{G}_{2\lambda}(T - \hat{\lambda}_k))^2 \right] \\ &= \frac{1}{K} \sum_{k=1}^K \mathbb{E}_{n,k} \left[ \bar{\psi}_2(W, \tilde{\theta}, \hat{p}_k, \hat{\lambda}_k, \hat{G}_{2\lambda}, \hat{\eta}_{2k})^2 \right], \end{aligned}$$

where the second inequality follows from  $\hat{G}_{2p} = -\tilde{\theta}/\hat{p}_k$ .

Because  $K$  is fixed, which is independent of  $N$ , it suffices to show that

$$J_k \equiv |\mathbb{E}_{n,k} [\bar{\psi}_2(W, \tilde{\theta}, \hat{p}_k, \hat{\lambda}_k, \hat{G}_{2\lambda}, \hat{\eta}_{2k})^2] - E_P [\bar{\psi}_2(W, \theta_0, p_0, \lambda_0, G_{2\lambda_0}, \eta_{20})^2]| = o_P(1).$$

By the triangle inequality, we have

$$J_k \leq J_{5,k} + J_{6,k},$$

where

$$J_{5,k} \equiv |\mathbb{E}_{n,k} [\bar{\psi}_2(W, \tilde{\theta}, \hat{p}_k, \hat{\lambda}_k, \hat{G}_{2\lambda}, \hat{\eta}_{2k})^2] - \mathbb{E}_{n,k} [\bar{\psi}_2(W, \theta_0, p_0, \lambda_0, G_{2\lambda_0}, \eta_{20})^2]|,$$

$$J_{6,k} \equiv |\mathbb{E}_{n,k} [\bar{\psi}_2(W, \theta_0, p_0, \lambda_0, G_{2\lambda_0}, \eta_{20})^2] - E_P [\bar{\psi}_2(W, \theta_0, p_0, \lambda_0, G_{2\lambda_0}, \eta_{20})^2]|.$$

Using the same arguments for  $I_{3,k}$  and  $I_{4,k}$  in the proof of repeated outcomes and the conditions (A.14) and (A.15), we can show  $J_{5,k} = o_P(1)$  and  $J_{6,k} = o_P(1)$ . Hence,  $\hat{\Sigma}_2 \xrightarrow{P} \Sigma_{20}$ .

*Step 2.* It remains to show (A.14) and (A.15). Define  $\bar{\psi}_{20} \equiv \bar{\psi}_2(W, \theta_0, p_0, \lambda_0, G_{2\lambda_0}, \eta_{20})$ . By the triangle inequality and

$$\bar{\psi}_2(W, \theta_0, p_0, \lambda_0, G_{2\lambda_0}, \eta_2) - \bar{\psi}_{20} = \psi_2(W, \theta_0, p_0, \lambda_0, \eta_2) - \psi_2(W, \theta_0, p_0, \lambda_0, \eta_{20}),$$

we have

$$\begin{aligned} \|\bar{\psi}_2(W, \theta_0, p, \lambda, G_{2\lambda_0}, \eta_2) - \bar{\psi}_{20}\|_{P,2} &\leq \|\psi_2(W, \theta_0, p_0, \lambda_0, \eta_2) - \psi_2(W, \theta_0, p_0, \lambda_0, \eta_{20})\|_{P,2} \\ &\quad + \|\partial_\lambda \bar{\psi}_2(W_i, \theta_0, p_0, \bar{\lambda}, G_{2\lambda_0}, \eta_2)\|_{P,2} |\lambda - \lambda_0| \\ &\quad + \|\partial_p \bar{\psi}_2(W_i, \theta_0, \bar{p}, \lambda, G_{2\lambda_0}, \eta_2)\|_{P,2} |p - p_0|, \end{aligned}$$

where  $\bar{p} \in (p, p_0)$  and  $\bar{\lambda} \in (\lambda, \lambda_0)$ . The term in the second line is bounded by

$$\begin{aligned} \|\partial_{\bar{\lambda}} \bar{\psi}_2(W_i, \theta_0, p_0, \bar{\lambda}, G_{2\lambda_0}, \eta_2)\|_{P,2} &\leq \frac{|1 - 2\bar{\lambda}|}{p_0 \bar{\lambda}^2 (1 - \bar{\lambda})^2} \left\| \frac{D - g(X)}{1 - g(X)} ((T - \bar{\lambda})Y - \ell_2(X)) \right\|_{P,2} \\ &\quad + \frac{1}{p_0 \bar{\lambda} (1 - \bar{\lambda})} \left\| \frac{D - g(X)}{1 - g(X)} \times Y \right\|_{P,2} + |G_{2\lambda_0}| \\ &\leq O(1) \end{aligned}$$

by the same arguments as in (A.9) through (A.11), and

$$\begin{aligned} |G_{2\lambda_0}| &= \left| E_P \left[ -\frac{1 - 2\lambda_0}{\lambda_0^2 (1 - \lambda_0)^2 p_0} \frac{D - g_0}{1 - g_0} ((T - \lambda_0)Y - \ell_{20}) - \frac{Y}{\lambda_0 (1 - \lambda_0) p_0} \frac{D - g_0}{1 - g_0} \right] \right| \\ &\leq \frac{|1 - 2\lambda_0|}{\lambda_0^2 (1 - \lambda_0)^2 p_0 \kappa} |E_P[UV_2]| + \frac{1}{\lambda_0 (1 - \lambda_0) p_0 \kappa} |E_P[YU]| \\ &\leq \frac{|1 - 2\lambda_0|}{\lambda_0^2 (1 - \lambda_0)^2 p_0 \kappa} C + \frac{1}{\lambda_0 (1 - \lambda_0) p_0 \kappa} C \\ &= O(1) \end{aligned}$$

because  $|E_P[UV_2]| \leq \|UV_2\|_{P,4} \leq C$  and  $|E_P[YU]| \leq C$ . Also, we have

$$\begin{aligned} \|\partial_{\bar{p}} \bar{\psi}_2(W_i, \theta_0, \bar{p}, \lambda, G_{2\lambda_0}, \eta_2)\|_{P,2} &\leq \frac{1}{\lambda (1 - \lambda) \bar{p}^2} \left\| \frac{D - g(X)}{1 - g(X)} ((T - \lambda)Y - \ell_2(X)) \right\|_{P,2} \\ &\quad + \left\| \frac{D\theta_0}{\bar{p}^2} \right\|_{P,2} \\ &\leq O(1) \end{aligned}$$

by the same arguments as in (A.9) through (A.11), and

$$\begin{aligned} |\theta_0| &= \left| E_P \left[ \frac{D - g_0(X)}{p_0 (1 - g_0(X))} (T - \lambda_0)Y \right] \right| \\ &\leq \frac{1}{p_0 \kappa} |E_P[(T - \lambda_0)YU]| \\ &= \frac{1}{p_0 \kappa} |E_P[(\ell_{20}(X) + V_2)U]| \\ &= \frac{1}{p_0 \kappa} |E_P[UV_2]| \\ &\leq \frac{C}{p_0 \kappa} \end{aligned}$$

because  $|E_P[UV_2]| \leq \|UV_2\|_{P,4} \leq C$ . Together with (A.5), we have

$$\begin{aligned} \|\bar{\psi}_2(W, \theta_0, p, \lambda, G_{2\lambda_0}, \eta_2) - \bar{\psi}_{20}\|_{P,2} &\leq O(\varepsilon_N) + O(1)O(N^{-1/2}) + O(1)O(N^{-1/2}) \\ &= O(\varepsilon_N), \end{aligned}$$

where I assume that  $\varepsilon_N$  converges to zero no faster than  $N^{-1/2}$ .

For (A.15), we have

$$\begin{aligned} \|\bar{\psi}_2(W, \theta_0, p_0, \lambda_0, G_{2\lambda_0}, \eta_{20})\|_{P,4} &= \left\| \frac{1}{\lambda_0(1-\lambda_0)p_0} \frac{UV_2}{1-g_0} - \frac{D\theta_0}{p_0} + G_{2\lambda_0}(T - \lambda_0) \right\|_{P,4} \\ &\leq \frac{1}{\lambda_0(1-\lambda_0)p_0\kappa} \|UV_2\|_{P,4} + \frac{1}{p_0} |\theta_0| + |G_{2\lambda_0}| \\ &\leq O(1) \end{aligned}$$

because  $\|UV_2\|_{P,4} \leq C$ . □

LEMMA A.1 (CONDITIONAL CONVERGENCE IMPLIES UNCONDITIONAL). *Let  $\{X_m\}$  and  $\{Y_m\}$  be sequences of random vectors. (i) If for  $\epsilon_m \rightarrow 0$ ,  $Pr(\|X_m\| > \epsilon_m | Y_m) \xrightarrow{P} 0$ , then  $Pr(\|X_m\| > \epsilon_m) \rightarrow 0$ . This occurs if  $E[\|X_m\|^q / \epsilon_m^q | Y_m] \xrightarrow{P} 0$  for some  $q \geq 1$ , by Markov's inequality. (ii) Let  $\{A_m\}$  be a sequence of positive constants. If  $\|X_m\| = O_P(A_m)$  conditional on  $Y_m$ , namely, that for any  $\ell_m \rightarrow \infty$ ,  $Pr(\|X_m\| > \ell_m A_m | Y_m) \xrightarrow{P} 0$ , then  $\|X_m\| = O_P(A_m)$  unconditionally, namely, that for any  $\ell_m \rightarrow \infty$ ,  $Pr(\|X_m\| > \ell_m A_m) \rightarrow 0$ .*

*PROOF:* This lemma is the Lemma 6.1 in Chernozhukov et al. (2018).

Abadie, A. (2005). Semiparametric difference-in-differences estimators, *Review of Economic Studies*, 72, 1–19.

Chernozhukov, V., D. Chetverikov, M. Demirer, E. Duflo, C. Hansen, W. Newey, and J. Robins (2018). Double/debiased machine learning for treatment and structural parameters, *Econometrics Journal*, 21, C1–C68.

Newey, W. K. and D. McFadden (1994). Large sample estimation and hypothesis testing, *Handbook of Econometrics*, 4, 2111–245.
